# Supplementary material
Source: publisher figshare collection journal article supplement (https://frontiersin.figshare.com/ndownloader/files/20755464)
Supplement: Supplementary file [file 20755464]

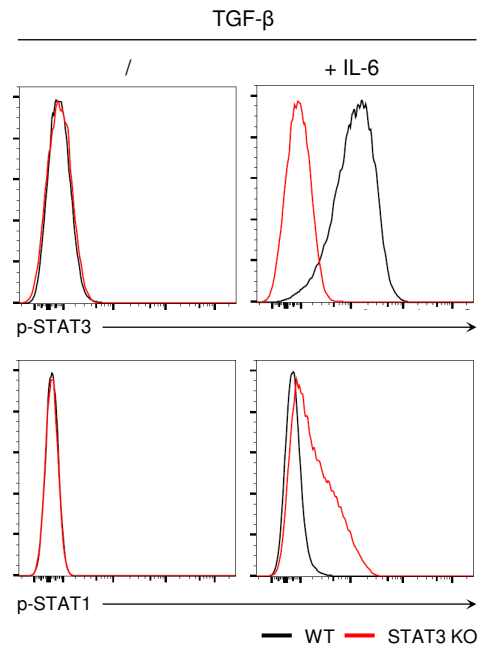

Figure S7. **In absence of STAT3 in Tregs, IL-6 signals via STAT1.** Histograms show the expression of pSTAT3 and pSTAT1 among Treg cells polarized *in vitro* in presence of TGF- $\beta$ , with or without IL-6 (gate CD4<sup>+</sup>).
